# Supplementary material
Source: PubMed Central journal article supplement (PMC5620123)
Supplement: NIHMS895312-supplement-Graphic_Abstract.pdf [file NIHMS895312-supplement-Graphic_Abstract.pdf]

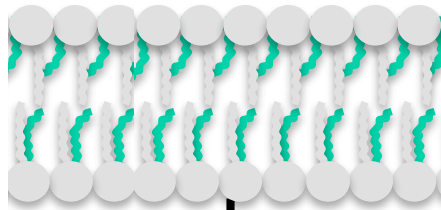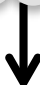

**Substrate**

**AA**

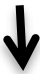

**Oxygenase**

**12-LOX**

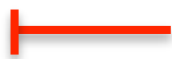

**ML355**

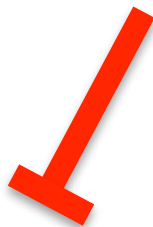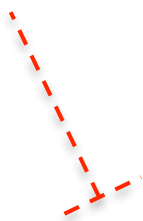

**Platelet activation  
aggregation  
Occlusive thrombus**

**Hemostasis**
